# Supplementary material
Source: PubMed Central journal article supplement (PMC2562576)
Supplement: NIHMS56646-supplement-Sup__Figures.pdf [file NIHMS56646-supplement-Sup__Figures.pdf]

## Supplementary Figures

### **Autophagic control of *Listeria* through intracellular innate immune recognition in *drosophila***

Tamaki Yano<sup>1</sup>, Shizuka Mita<sup>1</sup>, Hiroko Ohmori<sup>2</sup>, Yoshiteru Oshima<sup>1</sup>, Yukari Fujimoto<sup>3</sup>,  
Ryu Ueda<sup>4</sup>, Haruhiko Takada<sup>5</sup>, William E. Goldman<sup>6</sup>, Koichi Fukase<sup>3</sup>, Neal Silverman<sup>7</sup>,  
Tamotsu Yoshimori<sup>2</sup> & Shoichiro Kurata<sup>1\*</sup>

<sup>1</sup> Graduate School of Pharmaceutical Sciences, Tohoku University, Sendai 980-8578,  
Japan

<sup>2</sup> Research Institute for Microbial Diseases, Osaka University, Osaka 565-0871, Japan,  
CREST, Japan Science and Technology Agency, Tokyo 103-0027, Japan

<sup>3</sup> Graduate School of Science, Osaka University, Osaka 560-0043, Japan

<sup>4</sup> National Institute of Genetics, Mishima, 411-8540, Japan

<sup>5</sup> Graduate School of Dentistry, Tohoku University, Sendai 980-8575, Japan

<sup>6</sup> Washington University School of Medicine, St. Louis, Missouri 63110, USA

<sup>7</sup> Department of Medicine, University of Massachusetts Medical School, Worcester, MA  
01605, USA

Correspondence should be addressed to S.K. (kurata@mail.pharm.tohoku.ac.jp)

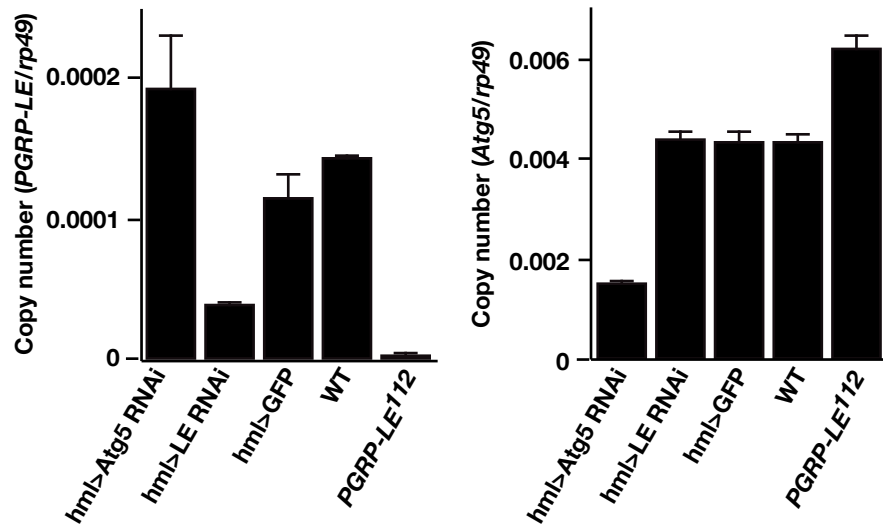

**Figure S1**

### Supplementary Figure 1

RNA interference against PGRP-LE or Atg5 using an hml-GAL4 driver efficiently reduces the expression of the target genes in hemocytes. Quantification of the expression of *PGRP-LE* and *Atg5* in hemocytes from third instar larvae of each genotype by real-time reverse transcription-polymerase chain reaction. *rp49* was used as an internal control. Bars indicate the variance of duplicate measurements. Genotypes: UAS-Atg5IR/+;;*hml-GAL4*/+ (hml>Atg5 RNAi), UAS-PGRP-LE IR/+; *hml-GAL4*/+ (hml>LE RNAi), UAS-GFP/+; *hml-GAL4*/+ (hml>GFP), Oregon R (wild-type), *PGRP-LE*<sup>112</sup> (LE<sup>112</sup>)

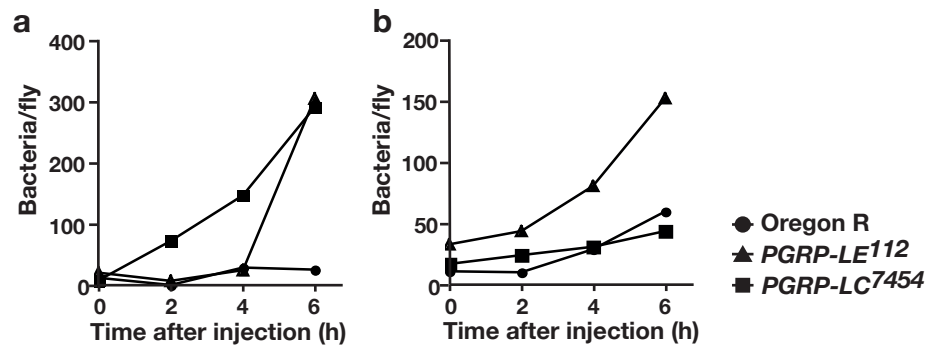

Figure S2

## Supplementary Figure 2

Differences in bacterial growth in humoral and cellular fractions of PGRP-LE and PGRP-LC mutant adult flies. After injection of approximately 50 wild-type *L. monocytogenes* per fly, wild-type (Oregon R) flies, *PGRP-LE*<sup>112</sup> flies, and *PGRP-LC*<sup>7454</sup> flies were dissected in PBS at the times indicated, the body debris were discarded, and the resultant humoral and cellular fractions were separated by centrifugation. *L. monocytogenes* growth in each fraction was quantified by determining colony-forming units by plate assay. **(a)** *L. monocytogenes* growth in the humoral (hemolymph) fraction. **(b)** *L. monocytogenes* growth in the cellular fraction. Results are representative of two independent experiments.

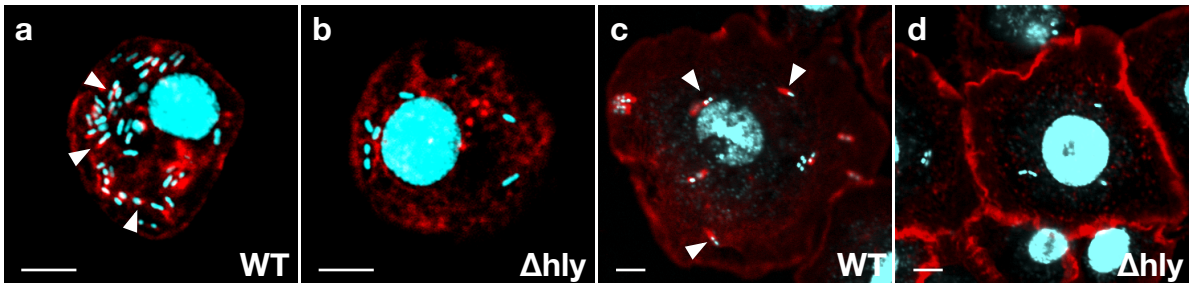

Figure S3

### Supplementary Figure 3

Cytoplasmic invasion of wild-type *L. monocytogenes* into drosophila cells. **(a, b)** *Ex vivo*-cultured hemocytes from *PGRP-LE<sup>112</sup>* larvae infected with **(a)** wild-type or **(b)**  $\Delta hly$  strain *L. monocytogenes* for 2.5 h (0.5 h incubation with bacteria and additional 2 h incubation in gentamicin-containing medium). **(c, d)** S2 cells were incubated with wild-type **(c)** or  $\Delta hly$  strain **(d)** *L. monocytogenes* for 0.5 h, and additionally incubated in gentamicin-containing medium for 1.5 h. **(a-d)** Fixed cells were stained with rhodamine-labeled phalloidin (red) and DAPI (cyan). Arrowheads indicate some of the actin tails at the poles of bacteria. Scale bars, 5  $\mu\text{m}$ .

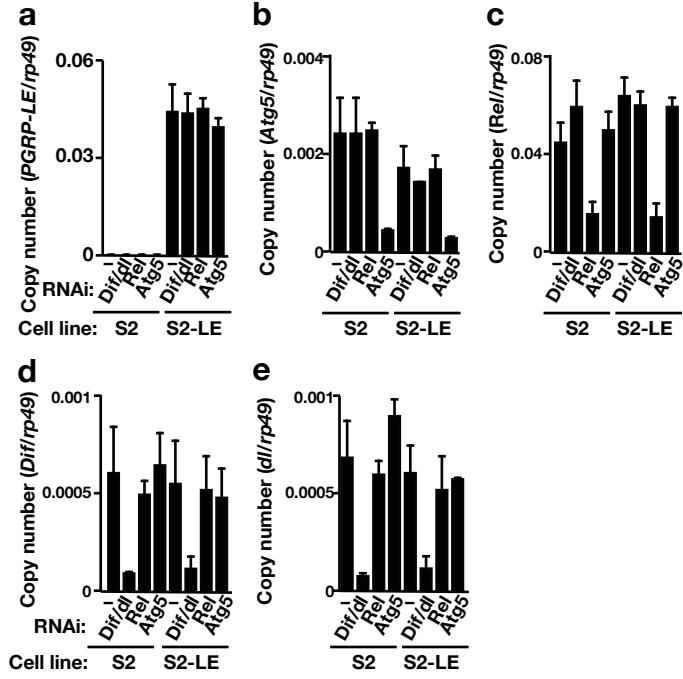

Figure S4



#### **Supplementary Figure 4**

Quantification of the expression of *PGRP-LE*, *Atg5*, *Relish*, *Dif*, and *dorsal* in S2 cells and S2 cells expressing PGRP-LE by real-time reverse transcription-polymerase chain reaction. **(a)** *PGRP-LE* **(b)** *Atg5* **(c)** *Relish (Rel)* **(d)** *Dif* **(e)** *dorsal (dl)*. *rp49* was used as an internal control. Bars indicate the variance of duplicate measurements.

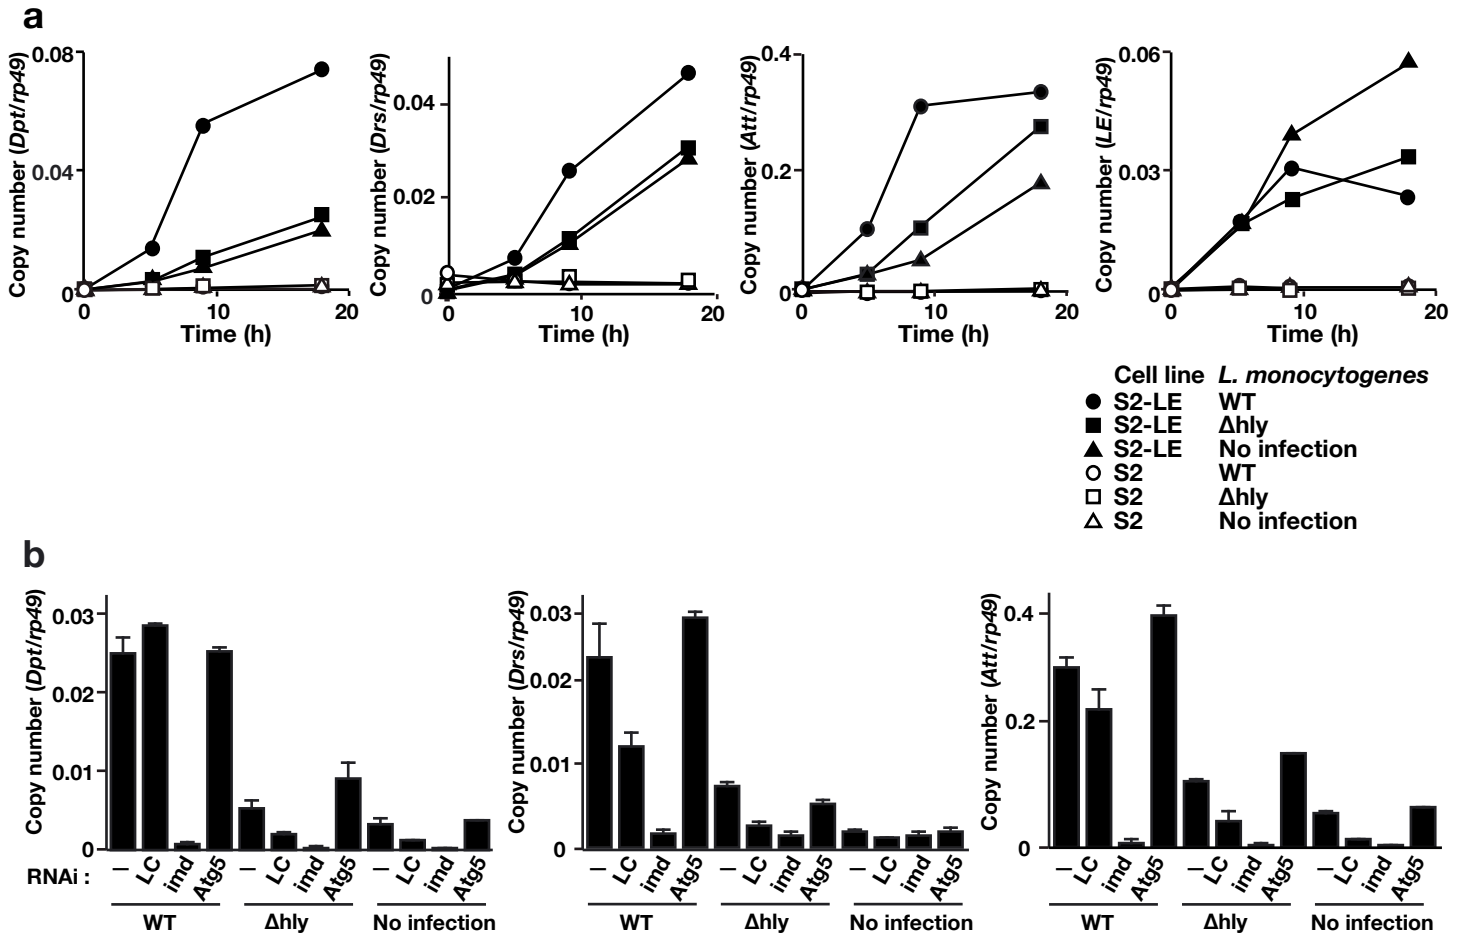

Figure S5

### Supplementary Figure 5

AMP induction in response to *L. monocytogenes* infection in S2 cells expressing PGRP-LE is dependent on *imd*, but not on *Atg5*. **(a)** Real-time reverse transcription-polymerase chain reaction of *Diptericin (Dpt)*, *Drosomycin (Drs)*, *Attacin (Att)*, *PGRP-LE (LE)*, and *rp49* (internal control). S2 cells and S2 cell lines stably transfected with a metallothionein-PGRP-LE construct (S2-LE). After 1.5 h infection with wild-type or  $\Delta hly$  *L. monocytogenes*, cells were cultured in CuSO<sub>4</sub>- and gentamicin-containing medium, and the RNA was extracted for analysis. **(b)** S2-LE cells were transfected with double-stranded RNA specific for the indicated genes (RNAi, below graph) and then infected with wild-type or  $\Delta hly$  *L. monocytogenes* for 1.5 h. After 9 h incubation in CuSO<sub>4</sub>-and gentamicin-containing medium, the RNA was extracted for real-time reverse transcription-polymerase chain reaction analysis. Bars indicate the variance of duplicate measurements.

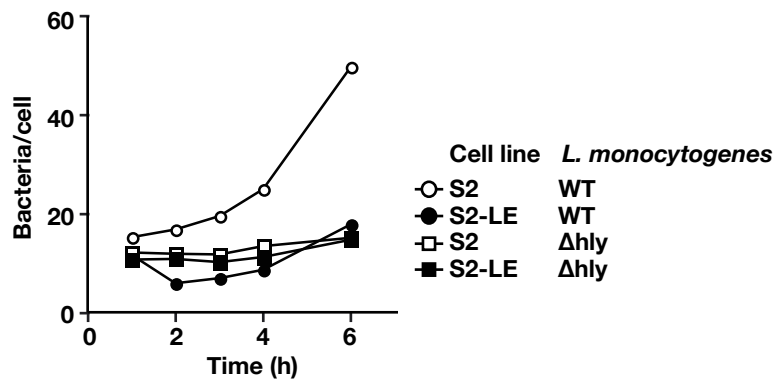

Figure S6

### **Supplementary Figure 6**

PGRP-LE is crucial for the clearance of intracellular *L. monocytogenes*. S2 cells or S2 cells expressing PGRP-LE (S2-LE) were infected with wild-type (WT) or  $\Delta hly$  *L. monocytogenes* (approximately 250 bacteria per cell) for 0.5 h, followed by incubation in CuSO<sub>4</sub>- and gentamicin-containing medium for the indicated time. *L. monocytogenes* growth was quantified by determining colony-forming units by plate assay.

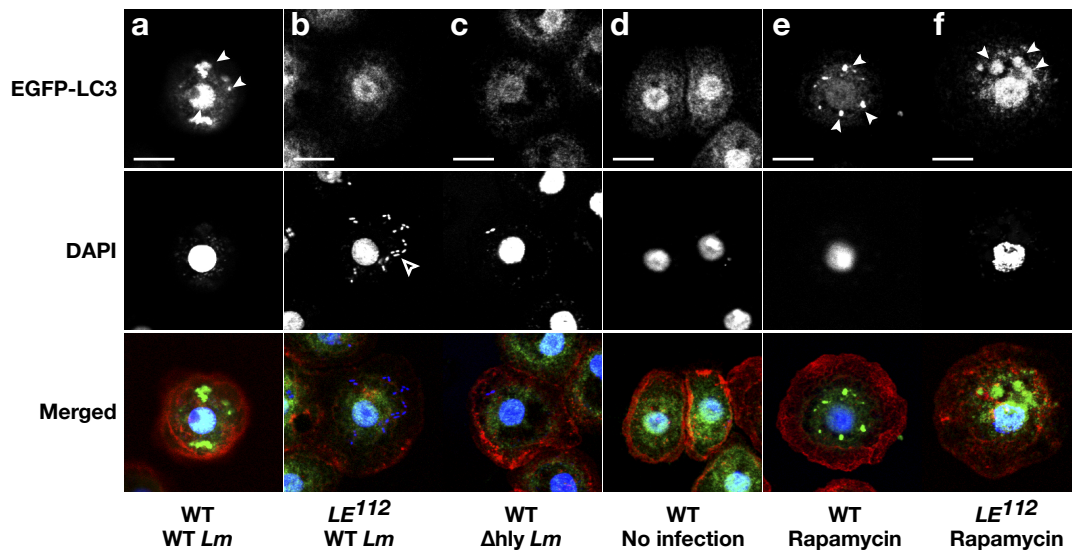

**Figure S7**

### Supplementary Figure 7

PGRP-LE is required for the induction of autophagy in response to *L. monocytogenes* infection in the cytoplasm. *Ex vivo*-cultured hemocytes from EGFP-LC3 expressing wild-type (WT) or *PGRP-LE*<sup>112</sup> (*LE*<sup>112</sup>) mutant-background third-instar larvae infected with wild-type (WT *Lm*) or  $\Delta hly$  strain ( $\Delta hly$  *Lm*) *L. monocytogenes*. EGFP-LC3 (green or white), rhodamine-labeled phalloidin staining of the actin cytoskeleton (red), and DAPI (blue or white). All images were obtained using a confocal microscope. Filled arrowheads indicate some of the dot-shaped EGFP-LC3 signals. The open arrowhead indicates *Lm* DNA. Bars represent 10  $\mu$ m.

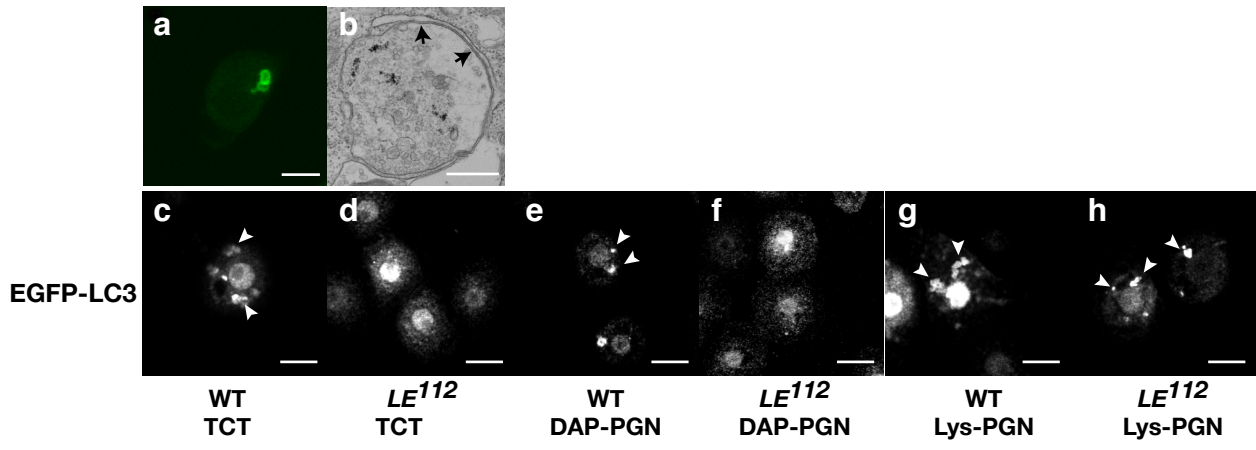

Figure S8



### Supplementary Figure 8

PGRP-LE is required for the induction of autophagy in response to TCT or DAP-type peptidoglycans. **(a)** A fluorescence microscopy image of S2 cells expressing PGRP-LE and GFP-LC3 (green) transfected with TCT. **(b)** An electron microscopy image of the fluorescence-positive field in **(a)**. Arrows indicate double-membrane structure. Scale bars represent 5  $\mu\text{m}$  in **(a)** and 500 nm in **(b)**. **(c-h)** *Ex vivo*-cultured hemocytes from GFP-LC3 expressing wild-type **(c, e, g)** or *PGRP-LE*<sup>112</sup> **(d, f, h)** mutant-background third-instar larvae treated with 100 nM TCT **(c, d)**, 100  $\mu\text{g/ml}$  highly purified DAP-type peptidoglycans from *L. plantarum* (DAP-PGN) **(e, f)**, or lysine-type peptidoglycans from *S. epidermidis* (Lys-PGN) **(g, h)**. All images were obtained using a confocal microscope. Some of the dot-shaped GFP-LC3 signals are indicated by filled arrowheads. Bars represent 10  $\mu\text{m}$ .
